# Supplementary material for: In vivo analysis of Caenorhabditis elegans noncoding RNA promoter motifs
Source: PubMed Central journal article supplement (PMC2527325; doi:10.1186/1471-2199-9-71), 2008-08-05
Supplement: 1471-2199-9-71-S1.pdf [file 1471-2199-9-71-S1.pdf]

Genomic locations of all ncRNA loci used in this work.

| <b>UM</b> | <b>Construct</b> | <b>chr</b> | <b>start</b> | <b>end</b> |
|-----------|------------------|------------|--------------|------------|
| UM1       | CeN7_100         | III        | 12250250     | 12250406   |
|           | CeN7_300         | III        | 12250075     | 12250406   |
|           | CeN7_1k          | III        | 12249340     | 12250406   |
|           | CeN16-1_100      | II         | 5543449      | 5543627    |
|           | CeN16-1_1k       | II         | 5542295      | 5543627    |
|           | CeN6_1k          | I          | 9066948      | 9066034    |
|           | CeN11_1k         | IV         | 5318419      | 5317305    |
|           | CeN19_1k         | I          | 13304632     | 13306059   |
| UM2       | CeN37_100        | IV         | 8375656      | 8375471    |
|           | CeN37_300        | IV         | 8375820      | 8375471    |
|           | CeN37_1k         | IV         | 8376515      | 8375471    |
|           | CeN55_100        | IV         | 8927113      | 8927335    |
| UM3       | CeN74-2_100      | X          | 14477324     | 14477495   |
|           | CeN74-2_300      | X          | 14477219     | 14477495   |
|           | CeN72_100        | V          | 5590554      | 5590709    |
