# Supplementary material for: In vivo analysis of Caenorhabditis elegans noncoding RNA promoter motifs
Source: PubMed Central journal article supplement (PMC2527325; doi:10.1186/1471-2199-9-71), 2008-08-05
Supplement: 1471-2199-9-71-S2.pdf [file 1471-2199-9-71-S2.pdf]

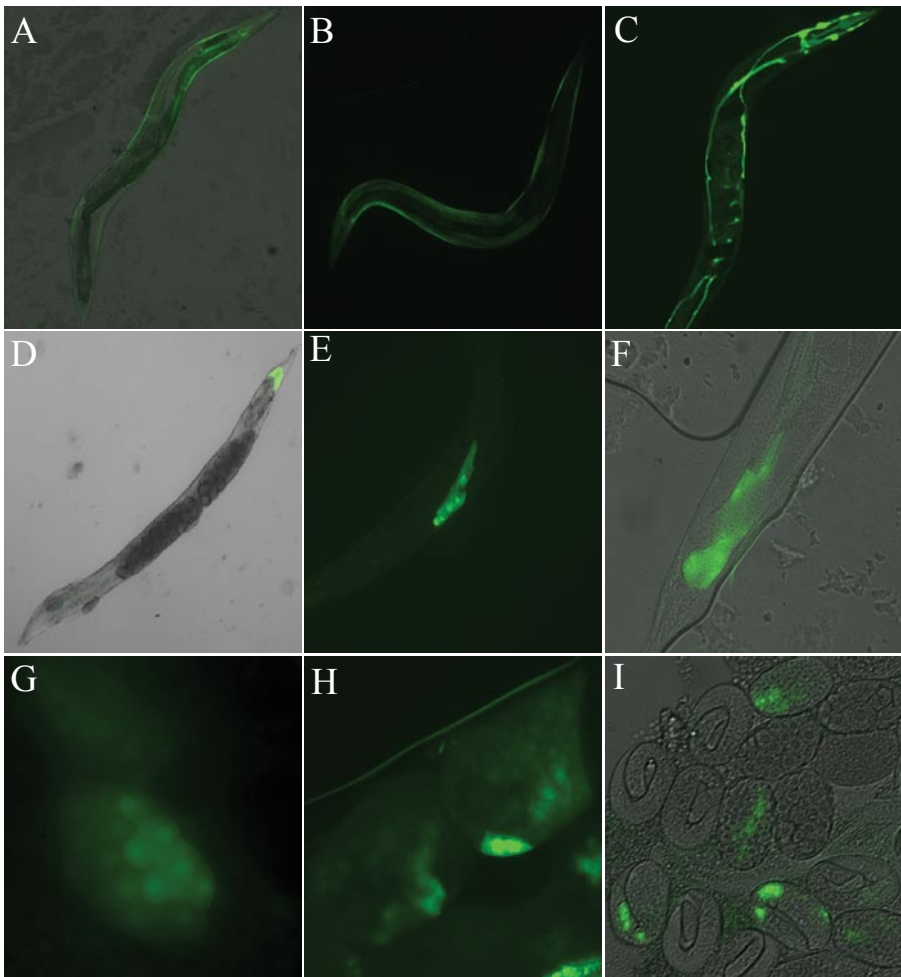

*In vivo* expression patterns of different SL2 loci (different lines from Figure 6 in the manuscript). Expression of GFP under the UM1 promoters from the loci of (A) CeN7::GFP (CeN7\_300), (B) CeN7::GFP (CeN7\_1k), (C) CeN16-1::GFP (CeN16-1\_1k), (D) CeN6::GFP (CeN6\_1k), (E) CeN19::GFP (CeN19\_1k), (F) CeN11::GFP (CeN11\_1k) are shown. Expression of (G) CeN7::GFP, (H) CeN19::GFP and (I) CeN16-1::GFP in embryos, respectively.
