# Supplementary material for: In vivo analysis of Caenorhabditis elegans noncoding RNA promoter motifs
Source: PubMed Central journal article supplement (PMC2527325; doi:10.1186/1471-2199-9-71), 2008-08-05
Supplement: 1471-2199-9-71-S4.pdf [file 1471-2199-9-71-S4.pdf]

All primers used in this work.

| <b>name of primers</b>       | <b>sequence (from 5'-end to 3'-end)</b>              |
|------------------------------|------------------------------------------------------|
| CeN7_1k                      | GCGAAGCTTTCCTCGATGCGAGTTCTTC                         |
| CeN7_300                     | GCGAAGCTTATAGAGAAAATTTGCGGC                          |
| CeN7_100                     | GCGAAGCTTGTCTCCCCCACAAAACACA                         |
| CeN7_R                       | GCGGATCCTTTTATTCGACACACTCT                           |
| CeN7_95_77                   | GGTTTTAACCCAGTTTAACCA                                |
| CeN37_1k                     | GCGAAGCTTACCGTAAGTCAGAAGATAGTT                       |
| CeN37_300                    | GCGAAGCTTAGTACGTGAGCGATTGAG                          |
| CeN37_100                    | GCGAAGCTTTGTACCCATCCCATTGAGAG                        |
| CeN37_R                      | GCGGATCCCATCATTTCCCTTCTACA                           |
| CeN37_95_77                  | TCTATGTGTACTCGCTCGTCG                                |
| CeN74-2_300                  | GCGAAGCTTAAAGTTGGGCTGACACAT                          |
| CeN74-2_100                  | GCGAAGCTTAGTTGCAGAACGTTATCTA                         |
| CeN74-2_R                    | GCGGATCCAACCTTGATAACCCACTGA                          |
| CeN74-2_95_77                | TGTATCGGTCCGGCGTCA                                   |
| pPD95_77_1_F                 | GATCCCCGGGATTGGCCA                                   |
| pPD95_77_2_F                 | GCCAAAGGACCCAAAGGT                                   |
| pPD95_77_1_R                 | CTTTGGGTCCTTTGGCCA                                   |
| pPD95_77_2_R                 | GAAAATGTTCTATGTTATGTTAGTATC                          |
| pPD95_77_3_R                 | TCAAGGGTCCTCCTGAAAAT                                 |
| pPD95_77_4_R                 | CACTGACAGAAAATTTGTGCC                                |
| CeN7_Amut_F                  | ACAAAACACAGCACCCGATACGGTTGAGCAAATGTCCGTCCAC          |
| CeN7_Amut_R                  | GTGGACGGACATTTGCTCAACCGTATCGGGTGCTGTGTTTTGT          |
| CeN7_Bmut_F                  | CGGAACCCGGCAAACACTGATCCACAGCAGATTAGTGG               |
| CeN7_Bmut_R                  | CCACTAATCTGCTGTGGATCAGTGTGTTGCCGGGTTCCG              |
| CeN7_Bmut_afterAmut_F        | TACGGTTGAGCAAACACTGATCCACAGCAGATTAGTGG               |
| CeN7_Bmut_afterAmut_R        | CCACTAATCTGCTGTGGATCAGTGTGTTGCTCAACCGTA              |
| CeN37_Amut_F                 | TCTGCTGTTGCACGCTCAACACGACAATTAAGAGACGTGGTCTTCA       |
| CeN37_Amut_R                 | TGAAGACCACGTCTCTTAATTGTCGTGTTGAGCGTGCAACAGCAGA       |
| CeN37_Bmut_F                 | GGTCTTCAGTAATACTACAAAGGTCGTATGGTTCTCTCACTGCATCTATGTG |
| CeN37_Bmut_R                 | CACATAGATGCAGTGAGAGAACCATACGACCTTTGTAGTATTACTGAAGACC |
| CeN74-2_Amut_F               | GCCATTGCACGAAAAACACTCATTATCTCACTCTCCCTTGGTAT         |
| CeN74-2_Amut_R               | ATACCAAGGGAGAGTGAGATAATGAGTGTGTTTCGTGCAATGGC         |
| CeN74-2_GTATAmut_F           | GCCTCACTCTCCCTTGACTCCAGAACAGCCTACAATCACCG            |
| CeN74-2_GTATAmut_R           | CGGTGATTGTAGGCTGTTCTGGAGTCAAGGGAGAGTGAGGC            |
| CeN74-2_GTATAmut_afterAmut_F | ATCTCACTCTCCCTTGACTCCAGAACAGCCTACAATCACCG            |
| CeN74-2_GTATAmut_afterAmut_R | CGGTGATTGTAGGCTGTTCTGGAGTCAAGGGAGAGTGAGAT            |
| CeN16-1_100                  | GGCAAGCTTGTTACTCAAGGTACGCTGGAGTT                     |
| CeN16-1_1k                   | GGCAAGCTTCCTGAACTCGTTTTGGTTAC                        |
| CeN16-1_R                    | GCGGGATCCTTGACACTCTCTTTCGAA                          |
| CeN16-1_95_77                | GGTTTTAACCCAGTTACTCA                                 |
| CeN55_100                    | GGCAAGCTTTTAGTGCTGTGACTCTCTGC                        |
| CeN55_R                      | GCGGATCCATATTGCACCTGCTACCA                           |

|               |                                       |
|---------------|---------------------------------------|
| CeN55_95_77   | GCCTAGAAACTCAGCGGTGT                  |
| CeN72_100     | GGCAAGCTTATGGGTTATTATCCTGTG           |
| CeN72_R       | GCGGGATCCCACAGGATAATAACCCAT           |
| CeN72_95_77   | ATCATCGGTCCGGTGTTG                    |
| CeN6_1k       | GCCCTGCAGGTTAAACTCTGATAAGGACGCC       |
| CeN6_R        | GCGGGATCCC GAAGAAGCTGTTCCAA           |
| CeN11_1k      | GGCAAGCTTTCATAACGATTTCAGTTGCTGC       |
| CeN11_R       | GCGGGATCCCAATCTTTCGAATGGTC            |
| CeN19_1k      | GGCAAGCTTGCATTGTTTTCTCTAGGAG          |
| CeN19_R       | GCGGGATCCAGAGAGTGTTCGATTGTG           |
| 3RT           | CCCTGTGAGCTCGTGGTCAA                  |
| 3AD           | UUUUGACCACGAGCTCACAGGG                |
| 3'CD5         | GGCCACGCGTTCGACTAGTAC(T)17V (V=A,C,G) |
| CeN18(U2)_F   | ATCGCTTCTTCGGCTTAT                    |
| CeN18(U2)_R   | GTCTTCCCTAGGTTCCAAA                   |
| CeN119_UM2_F  | ATGTGTGCGCTGTGTGCA                    |
| CeN39_UM2_F   | CCGTTAGTCGCTGGTTCGT                   |
| CeN50-2_UM2_F | GGCACCCACTGGTTCAATT                   |
| CeN53_UM2_F   | CCGGTCAGTGTGTTTGCTGT                  |
| CeN55_UM2_F   | AGTCAGCAGTCCGCGTGAT                   |
| CeN37_UM2_F   | GAGACGTGGTCTTCAGTAATACT               |
| CeN119_UM2_R  | ACATGCTGCCGGCCTCGAA                   |
| CeN55_UM2_R   | ATCACGCGGACTGCTGACT                   |
| CeN53_UM2_R   | CCAGAGGGATTGAACTCTCAAC                |
| CeN50-2_UM2_R | ACACAGGGAATTGAACCAGTGG                |
| CeN39_UM2_R   | ATCCGCCATAAACTCTACAGC                 |
| CeN37_UM2_R   | AGTATTACTGAAGACCACGTCTC               |
